# Supplementary material for: Fusobacterium nucleatum promotes tumor progression in KRAS p.G12D-mutant colorectal cancer by binding to DHX15
Source: Springer Nature journal article supplement (doi:10.1038/s41467-024-45572-w), 2024-02-24
Supplement: MOESM1 [file 41467_2024_45572_MOESM1_ESM.pdf]

## Supplementary Figures

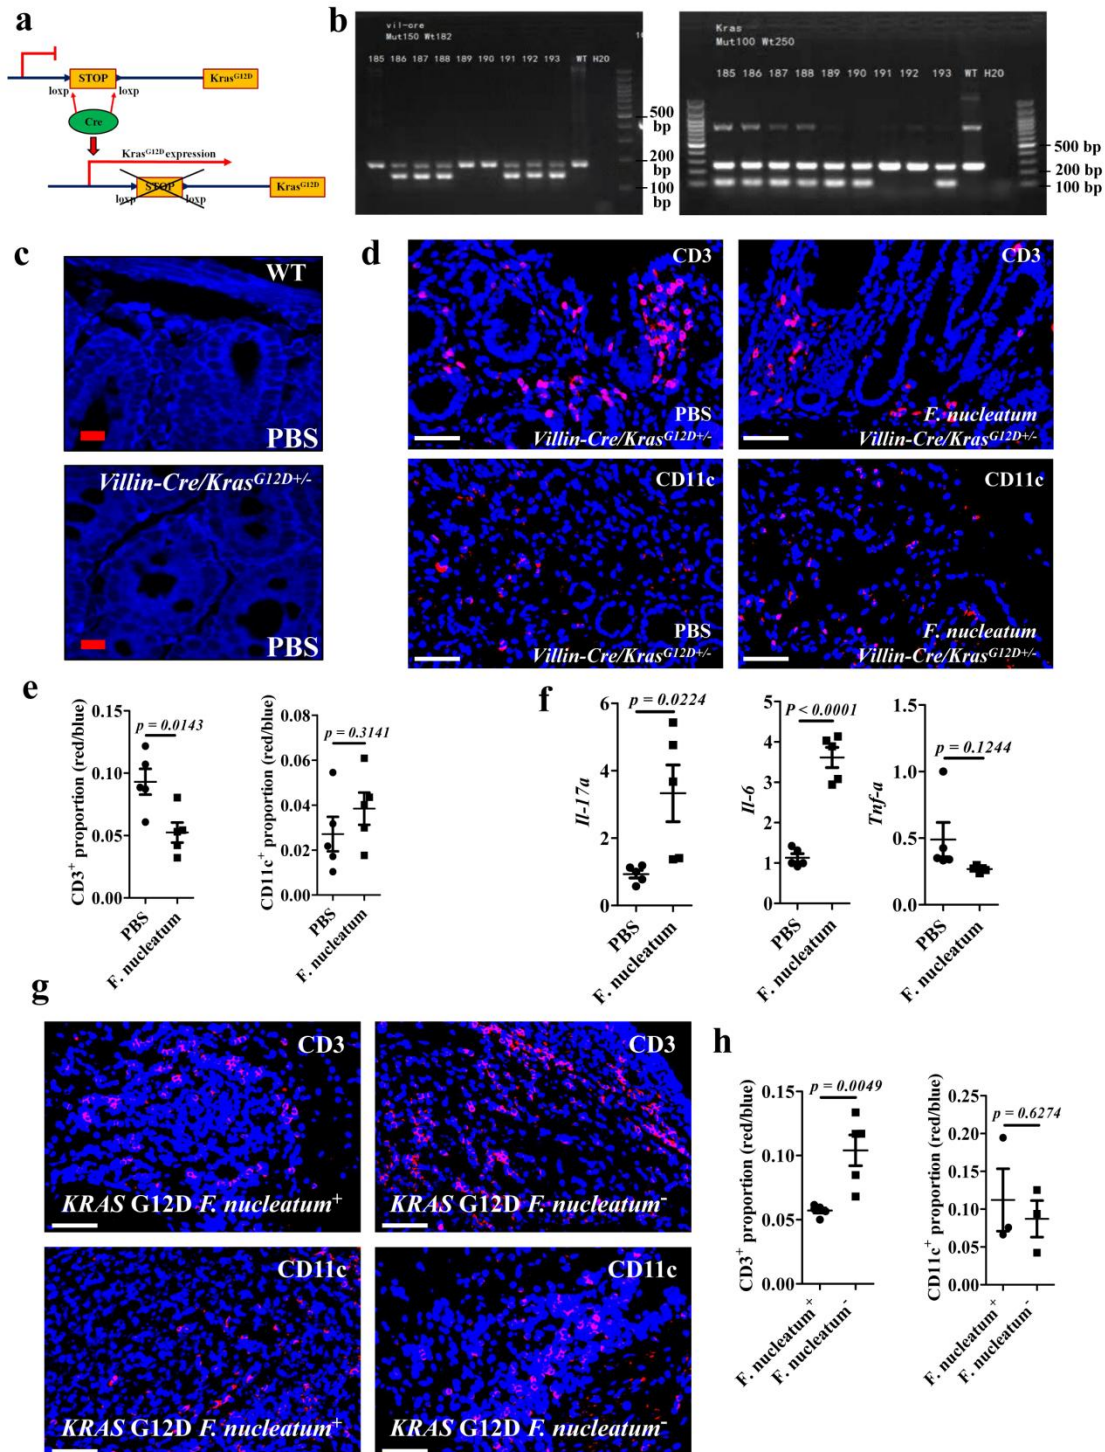

**Supplementary Fig. 1** a Schematic diagram of *Villin-Cre/Kras*<sup>G12D/+</sup> mouse model construction. b *Villin-Cre/Kras*<sup>G12D/+</sup> genotyping using 150 bp band for *Cre* and 100 bp band for *Kras*<sup>G12D</sup>. c FISH detection of *F. nucleatum* in colonic tissues derived from PBS treated-*Villin-Cre/Kras*<sup>G12D/+</sup> mice and WT littermates using a

Cy3-conjugated *F. nucleatum* specific probe (red), n = 5, scale bar: 50  $\mu$ m. **d** Representative immunofluorescence detection of CD3 and CD11c positive cells in colonic tissues of PBS and *F. nucleatum* treated *Villin-Cre/Kras<sup>G12D+/-</sup>* mice, scale bar: 50  $\mu$ m. **e** Statistical analysis of the results in (**d**). Significant differences are indicated: two-tailed Student's t-test, n = 5 per group (mean  $\pm$  SEM). **f** qPCR analysis of *Il-17a*, *Il-6*, *Tnf- $\alpha$*  mRNA expression in colonic tissues of PBS and *F. nucleatum* treated *Villin-Cre/Kras<sup>G12D+/-</sup>* mice. Significant differences are indicated: two-tailed Student's t-test, n = 5 per group (mean  $\pm$  SEM). **g** Representative immunofluorescence detection of CD3 and CD11c positive cells in in *KRAS* p.G12D mutant patients with low *F. nucleatum* abundance (*F. nucleatum*<sup>-</sup>) and high *F. nucleatum* abundance (*F. nucleatum*<sup>+</sup>), scale bar: 50  $\mu$ m. **h** Statistical analysis of the results in (**g**). Significant differences are indicated: two-tailed Student's t-test, n = 5 (left panel) and 3 (right panel) per group (mean  $\pm$  SEM). Source data are provided as a Source Data file.

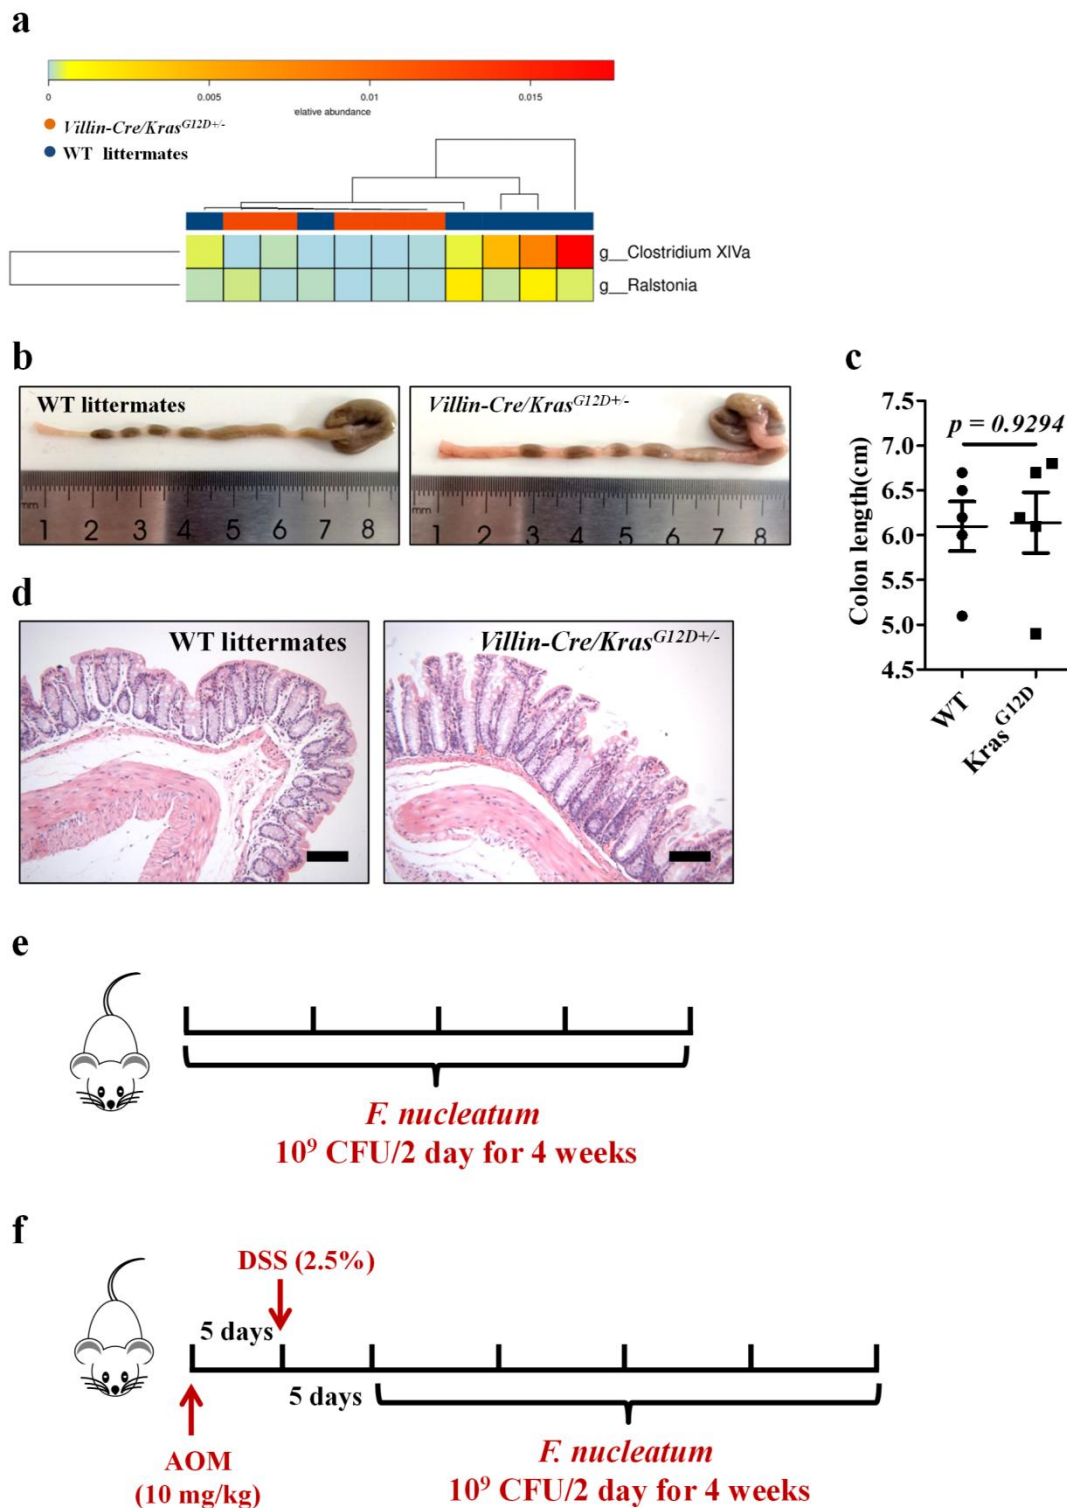

**Supplementary Fig. 2** **a** Heat map of top differentially abundant genera between *Villin-Cre/Kras<sup>G12D+/-</sup>* mice (n = 5) and WT littermates (n = 6). **b** Representative images of the colons of *Villin-Cre/Kras<sup>G12D+/-</sup>* mice and WT littermates. **c** Statistical analysis of the colon length of *Villin-Cre/Kras<sup>G12D+/-</sup>* mice and WT littermates.

Significant differences are indicated: two-tailed Student's t-test, n = 5 per group (mean  $\pm$  SEM). **d** Representative H&E staining of the colons of *Villin-Cre/Kras<sup>G12D+/-</sup>* mice and WT littermates, scale bar: 50  $\mu$ m. **e** Schematic diagram of the experimental design and timeline of mouse models of Fig. 3a. **f** Schematic diagram of the experimental design and timeline of mouse models of Fig. 3b. Source data are provided as a Source Data file.

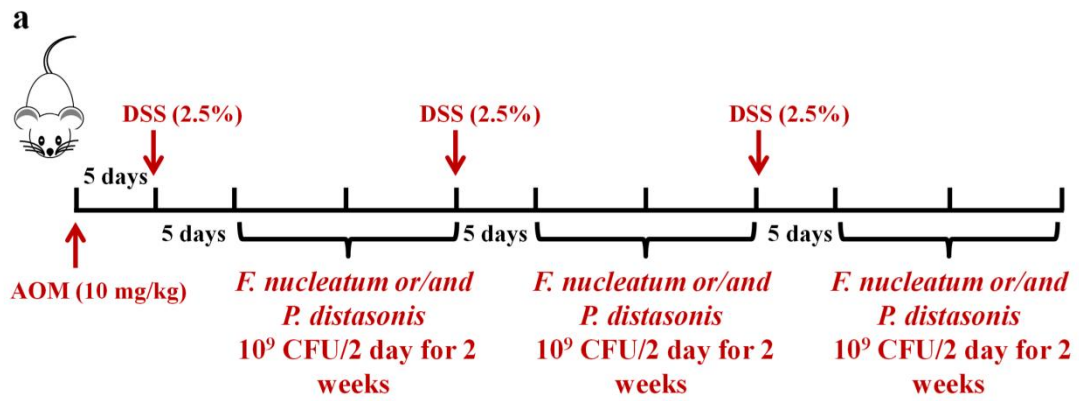

**Supplementary Fig. 3 a** Schematic diagram of the experimental design and timeline of mouse models of Fig. 4a.

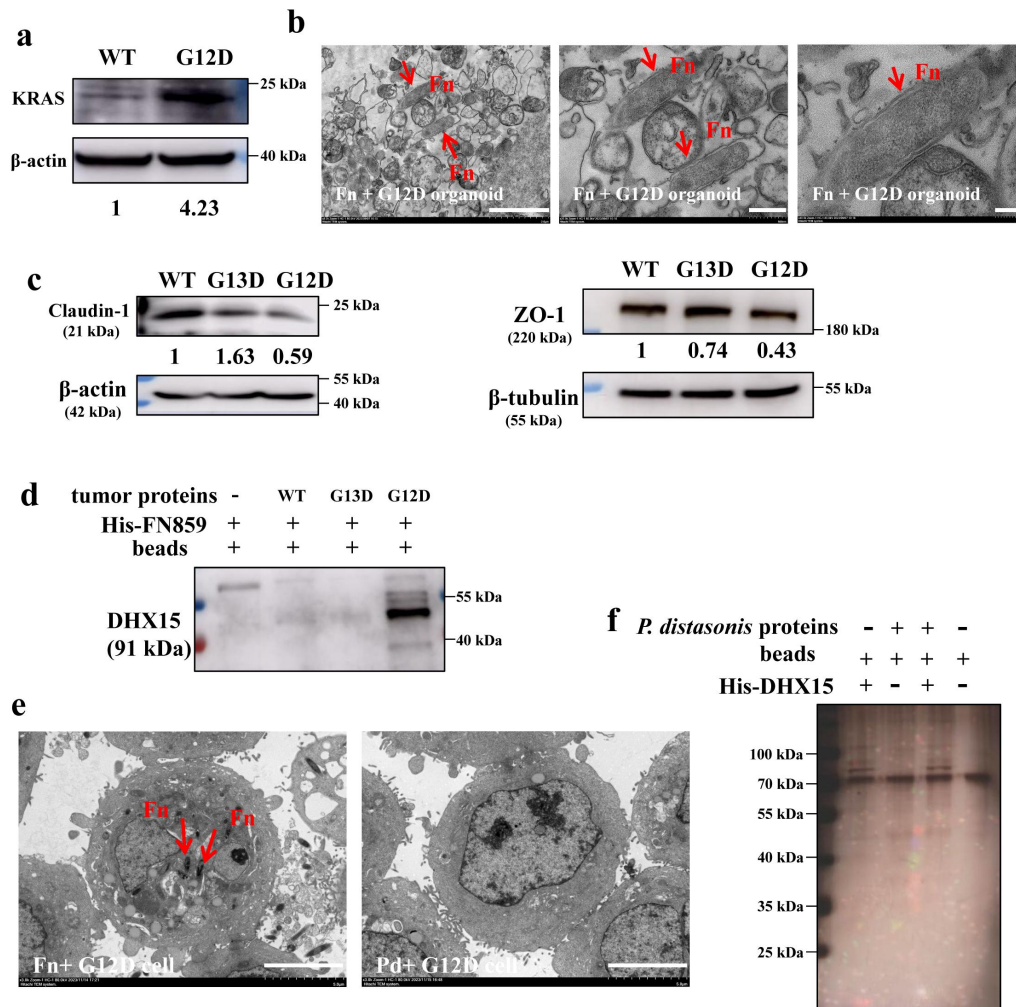

**Supplementary Fig. 4** **a** HT-29 cells were transfected by *KRAS* G12D-sgRNA-Cas-EGFP and negative scramble control-EGFP lentiviral plasmids. Western blot analysis of *KRAS* expression in *KRAS* WT cells and *KRAS* p.G12D cells. **b** *F. nucleatum* was visible inside the *KRAS* p.G12D organoids by transmission electron microscope, scale bar: 20µm, 5µm, 2 µm respectively. **c** Western blot analysis of claudin-1 and ZO-1 expression in *KRAS* WT, *KRAS* p.G12D and *KRAS* p.G12D tumor cells. **d** Pull-down assays were performed and validation of the FN1859-DHX15 interaction in *KRAS* WT, *KRAS* p.G12D and *KRAS* p.G12D CRC patient samples by western blot. **e** TEM images of G12D cells incubated with *F. nucleatum* (left panel) and *P. distasonis* (right panel), scale bar: 50µm. **f** Pull-down assays were performed and validation of the *P. distasonis*-DHX15 interaction by silver staining. Data are representative of two independent experiments. Source data are provided as a Source Data file.

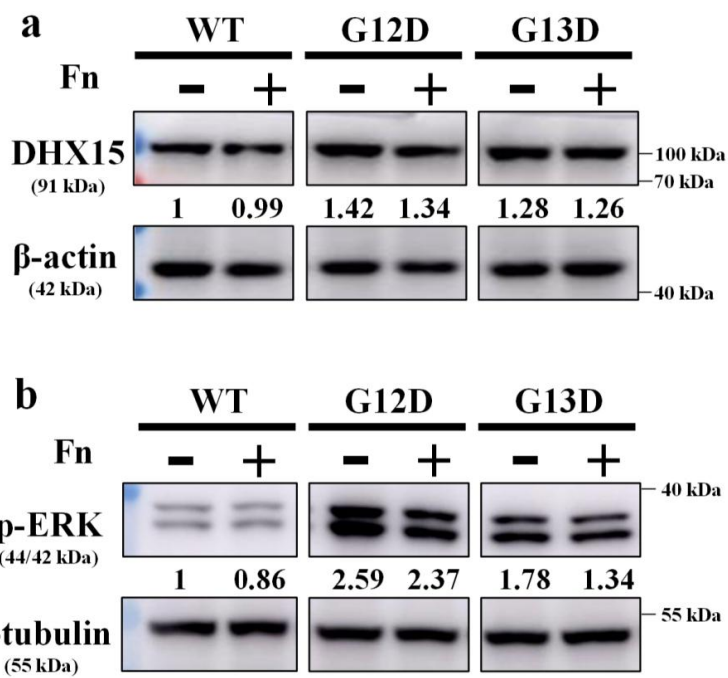

**Supplementary Fig. 5 a** Western blotting analysis of DHX15 expression in *KRAS* WT, *KRAS* p.G12D and *KRAS* p.G13D tumor cells after PBS or *F. nucleatum* treatment. **b** Western blotting analysis of p-ERK expression in *KRAS* WT, *KRAS* p.G12D and *KRAS* p.G13D tumor cells after PBS or *F. nucleatum* treatment. Data are representative of three independent experiments. Source data are provided as a Source Data file.

**a**

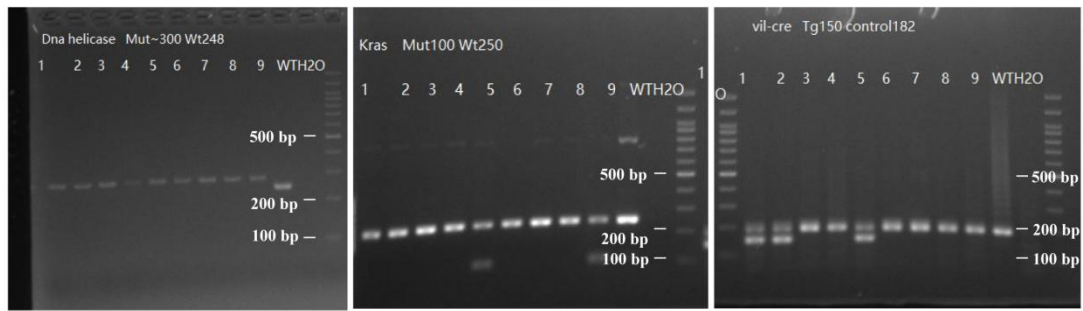

**Supplementary Fig. 6 a.** *Villin-Cre/Kras<sup>G12D</sup><sup>+/-</sup>/Dhx15<sup>fl/fl</sup>* genotyping using 150 bp band for *Cre*, 100 bp band for *Kras<sup>G12D</sup>* and 300 bp band for *Dhx15*.

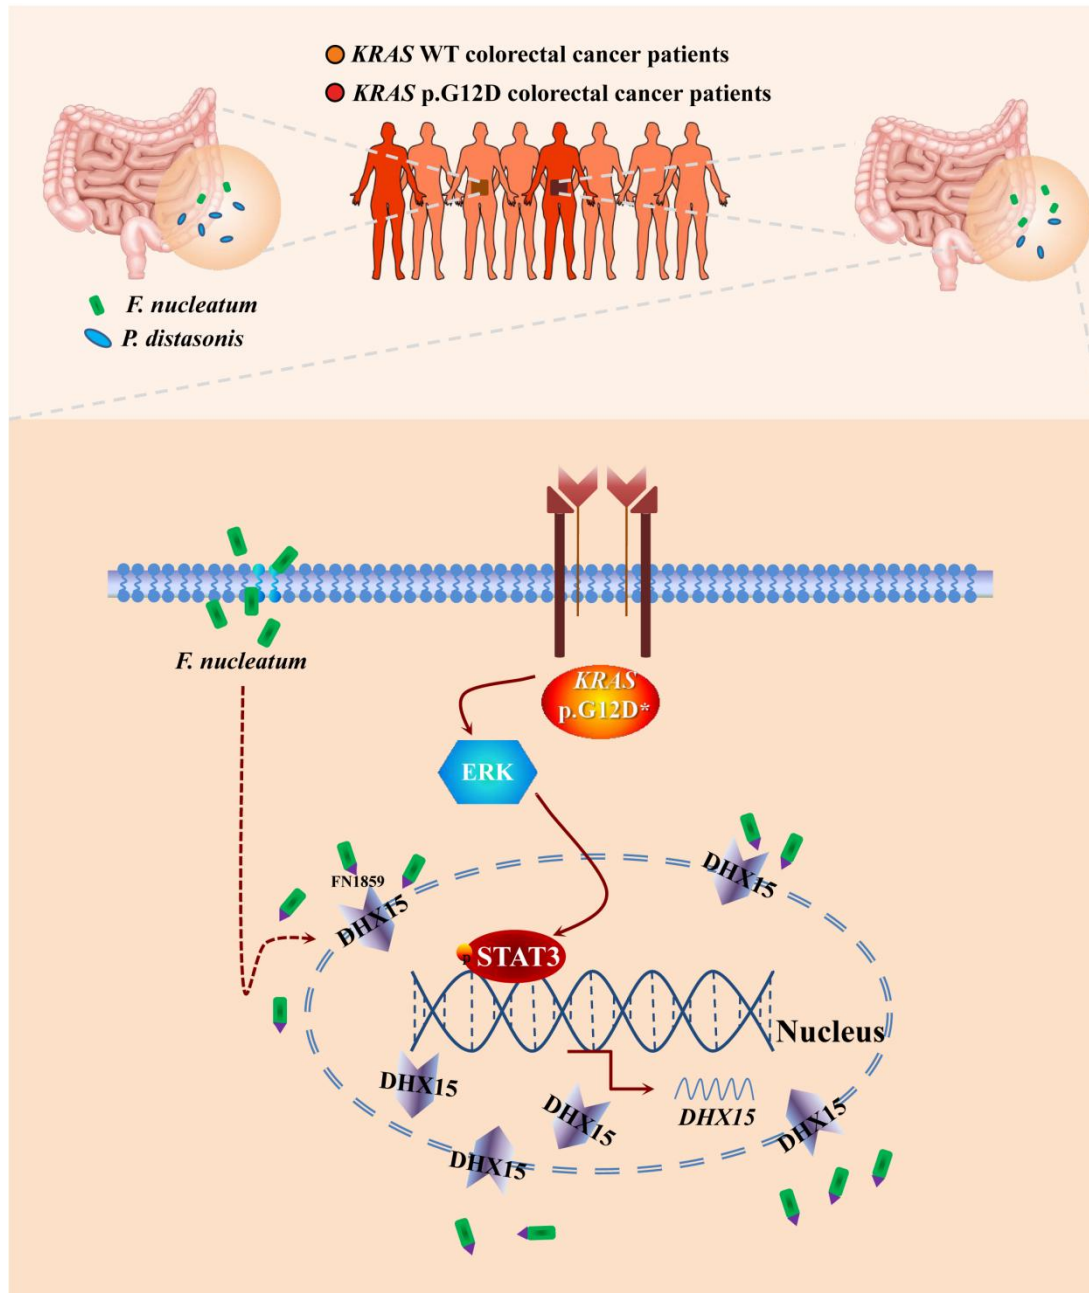

**Supplementary Fig. 7** *KRAS* p.G12D mutant colorectal cancer cells induce more *F. nucleatum* enrichment and the invasion of *F. nucleatum* could be antagonized by *P. distasonis*. The mutation leads to ERK-STAT3 signaling pathway activation and DHX15 overexpression. *F. nucleatum* invaded into *KRAS* p.G12D mutant colorectal cancer cells and bind to DHX15 to potentiates colorectal tumorigenesis. The oncogenic effect of *F. nucleatum* depends on somatic genetics and gut microbial

ecology and personalized modulation of the gut microbiota may provide a more targeted strategy for CRC treatment.

## Supplementary Tables

**Supplementary Table 1. Information of CRC patients.**

**Patients' characteristics of CRC in Fig. 1b**

| Gender | Age       | Tumor location | Tumor size | Tumor invasion                 | Lymph node metastasis | distant metastasis |
|--------|-----------|----------------|------------|--------------------------------|-----------------------|--------------------|
| Female | ≤65 years | Rectal         | ≤5cm       | T <sub>1</sub> -T <sub>2</sub> | N0                    | Absent             |
| 75     | 65        | 100            | 97         | 77                             | 15                    | 154                |
| Male   | >65years  | Colon          | >5cm       | T <sub>3</sub> -T <sub>4</sub> | N1                    | Present            |
| 164    | 65        | 138            | 142        | 162                            | 43                    | 85                 |
|        |           |                |            |                                | N2                    |                    |
|        |           |                |            |                                | 181                   |                    |

**Patients' characteristics of human colorectal tumor organoids**

| Gender | Age       | Tumor location | Tumor size | Tumor invasion                 | Lymph node metastasis | distant metastasis |
|--------|-----------|----------------|------------|--------------------------------|-----------------------|--------------------|
| Female | ≤65 years | Rectal         | ≤5cm       | T <sub>1</sub> -T <sub>2</sub> | N0                    | Absent             |
| 4      | 6         | 11             | 8          | 5                              | 7                     | 9                  |
| Male   | >65years  | Colon          | >5cm       | T <sub>3</sub> -T <sub>4</sub> | N1                    | Present            |
| 11     | 9         | 4              | 7          | 10                             | 6                     | 6                  |
|        |           |                |            |                                | N2                    |                    |
|        |           |                |            |                                | 2                     |                    |

**Supplementary Table 2. The data of logistic regression model (two-sided) that *P. distasonis* as an outcome with *KRAS*, *F. nucleatum*, and their interaction term (*KRAS* x *F. nucleatum*) as exposures.**

|                     | <i>p</i> value | OR    | Confidence limit (CI) |              |
|---------------------|----------------|-------|-----------------------|--------------|
|                     |                |       | Lower limits          | Upper limits |
| <i>F. nucleatum</i> | 0.028          | 0.548 | 0.321                 | 0.936        |
| <i>KRAS</i>         | 0.542          | 0.849 | 0.502                 | 1.437        |

**Supplementary Table 3. The differential proteins pulled by FN1859 in *KRAS* WT, *KRAS* p.G12D mutation and *KRAS* p.G13D mutation HT-29 cells.**

| Accession | Gene  | Mw(kD) | G12D | G13D | NC | log <sub>2</sub> (G13D/G12D) | log <sub>2</sub> (MeanSP) | Diff Sig | log <sub>2</sub> (NC/G12D) | log <sub>2</sub> (MeanSP) | Diff Sig |
|-----------|-------|--------|------|------|----|------------------------------|---------------------------|----------|----------------------------|---------------------------|----------|
| P02545    | LMNA  | 74.139 | 1    | 1    | 30 | 0                            | 0                         |          | 4.9069                     | 3.9542                    | ++       |
| P23246    | SFPQ  | 76.149 | 1    | 1    | 8  | 0                            | 0                         |          | 3                          | 2.1699                    | ++       |
| O43143    | DHX15 | 90.933 | 5    | 1    | 1  | -2.3219                      | 1.585                     | --       | -2.3219                    | 1.585                     | --       |
| Q15233    | NONO  | 54.232 | 1    | 1    | 5  | 0                            | 0                         |          | 2.3219                     | 1.585                     | ++       |

**Supplementary Table 4. Primers for PCR.**

| <b>Primers for PCR</b> |                |                         |                       |
|------------------------|----------------|-------------------------|-----------------------|
| <b>Genes</b>           | <b>Species</b> | <b>Forward primer</b>   | <b>Reverse primer</b> |
| DHX15                  | Human          | GGTCCACAGATCTTTTCTTGTGC | CCTAGCCATAAGGGCTGTACC |
| Il-17A                 | Mouse          | TTTAACTCCCTTGGCGCAAAA   | CTTCCCTCCGCATTGACAC   |
| Il-6                   | Mouse          | TAGTCCTTCCTACCCCAATTTCC | TTGGTCCTTAGCCACTCCTTC |
| Tnf- $\alpha$          | Mouse          | GACGTGGAAGTGGCAGAAGAG   | TTGGTGGTTTGTGAGTGTGAG |

**Supplementary Table 5. Antibodies for WB.**

| <b>Antibodies for WB</b>              |        |                           |             |
|---------------------------------------|--------|---------------------------|-------------|
| Mouse anti- $\beta$ -actin antibody   | 1:2000 | Cell Signaling Technology | #3700S      |
| Mouse anti- $\beta$ -tubulin antibody | 1:1000 | SantaCruz                 | #SC-5274    |
| Rabbit anti-DHX15 Ab                  | 1:1000 | Proteintech               | #12265-1-AP |
| Rabbit anti-p-ERK1/2 Ab               | 1:2000 | Cell Signaling Technology | #4370S      |
| Rabbit anti-p-AKT Ab                  | 1:1000 | Cell Signaling Technology | #4060S      |
| Rabbit anti-KRAS Ab                   | 1:1000 | Abcam                     | #ab180772   |
| Rabbit anti-Claudin-1 Ab              | 1:1000 | Proteintech               | #13050-1-AP |
| Rabbit anti-ZO-1 Ab                   | 1:1000 | Proteintech               | #21773-1-AP |
| HRP-labeled goat anti-mouse IgG(H+L)  | 1:2000 | Beyotime                  | #A0216      |
| HRP-labeled goat anti-rabbit IgG(H+L) | 1:1000 | Beyotime                  | #A0208      |

**Supplementary Table 6. 16S sequencing data of *P. distasonis*.**

| <u>Description</u>                                                                                                   | <u>Max Score</u> | <u>Total Score</u> | <u>Query Cover</u> | <u>E value</u> | <u>Per. Ident</u> | <u>Accession</u>           |
|----------------------------------------------------------------------------------------------------------------------|------------------|--------------------|--------------------|----------------|-------------------|----------------------------|
| Uncultured organism clone<br>ELU0049-T299-S-NIPCRAMgANa_000121 small subunit<br>ribosomal RNA gene, partial sequence | 2663             | 2663               | 99%                | 0.0            | 99.86%            | <a href="#">HQ761955.1</a> |
| Parabacteroides sp. strain CT06 16S ribosomal RNA gene,<br>partial sequence                                          | 2662             | 2662               | 99%                | 0.0            | 99.86%            | <a href="#">KY703631.1</a> |
| Uncultured bacterium clone SJTU_D_07_93 16S ribosomal<br>RNA gene, partial sequence                                  | 2662             | 2662               | 100%               | 0.0            | 99.79%            | <a href="#">EF401259.1</a> |
| Parabacteroides distasonis ATCC 8503 isolate<br>Parabacteroides distasonis 82G9 genome assembly,<br>chromosome: 1    | 2656             | 18596              | 100%               | 0.0            | 99.72%            | <a href="#">LR215978.1</a> |
| Parabacteroides sp. CT06, complete genome                                                                            | 2656             | 18285              | 100%               | 0.0            | 99.72%            | <a href="#">CP022754.1</a> |
| Uncultured bacterium clone SJTU_D_03_79 16S ribosomal<br>RNA gene, partial sequence                                  | 2656             | 2656               | 100%               | 0.0            | 99.72%            | <a href="#">EF400947.1</a> |
| Uncultured organism clone<br>ELU0049-T299-S-NIPCRAMgANa_000452 small subunit<br>ribosomal RNA gene, partial sequence | 2652             | 2652               | 99%                | 0.0            | 99.72%            | <a href="#">HQ762286.1</a> |
| Uncultured organism clone ELU0133-T352-S-NI_000178<br>small subunit ribosomal RNA gene, partial sequence             | 2652             | 2652               | 99%                | 0.0            | 99.72%            | <a href="#">HQ794006.1</a> |
| Uncultured organism clone<br>ELU0073-T501-S-NIPCRAMgANa_000631 small subunit<br>ribosomal RNA gene, partial sequence | 2652             | 2652               | 99%                | 0.0            | 99.79%            | <a href="#">HQ774231.1</a> |
| Uncultured organism clone ELU0008-T58-S-NI_000191<br>small subunit ribosomal RNA gene, partial sequence              | 2652             | 2652               | 99%                | 0.0            | 99.72%            | <a href="#">HQ740098.1</a> |

**S000152**

**1**

**1450bp**

AGGATGAACGCTAGCGACAGGCTTAACACATGCAAGTCGAGGGGCAGCACAGGTAGCAATACCGGGT  
GGCGACCGGCGCACGGGTGAGTAACGCGTATGCAACTTGCCTATCAGAGGGGGATAACCCGGCGAAA  
GTCGGACTAATACCGCATGAAGCAGGGATCCCGCATGGGAATATTTGCTAAAGATTCATCGCTGATAGA  
TAGGCATGCGTTCCATTAGGCAGTTGGCGGGTAACGGCCACCAAACCGACGATGGATAGGGTTCT  
GAGAGGAAGGTCCCCACATTGGTACTGAGACACGGACCAAACCTCCTACGGGAGGCAGCAGTGAGG  
AATATTGGTCAATGGCCGAGAGGCTGAACCAGCCAAGTCGCGTGAGGGATGAAGGTTCTATGGATCGT  
AAACCTCTTTTATAAGGGAATAAAGTGCGGGACGTGTCCCGTTTTGTATGTACCTTATGAATAAGGATC  
GGCTAACTCCGTGCCAGCAGCCGCGTAATACGGAGGATCCGAGCGTTATCCGGATTTATTGGGTTTAA  
AGGGTGCCTAGGCGGCCTTTAAGTCAGCGGTGAAAGTCTGTGGCTCAACCATAGAATTGCCGTTGAA  
ACTGGGGGGCTTGTAGTATGTTTGTAGGCAGGCGGAATGCGTGGTGTAGCGGTGAAATGCATAGATATCA  
CGCAGAACCCCGATTGCGAAGGCAGCCTGCCAAGCCATTACTGACGCTGATGCACGAAAGCGTG  
ATCAAACAGGATTAGATACCCTGGTAGTCCACGCAGTAAACGATGATCACTAGCTGTTTGGC  
GATAATTGTAAGCGGCACAGCGAAAGCGTTAAGTGATCCACCTGGGGAGTACGCCGGAACGGT  
GAAACTCAAAGGAATTGACGGGGCCCGCACAAAGCGGAGGAACATGTGGTTTAAATTCGATGATACGCGAGGAACCT  
TACCCGGGTTTGAACGCATTCCGACCGAGGTGAAACACCTTTTCTAGCAATAGCCGTTTGC  
GAGGTGCTGCATGTTGTCGTAGCTCGTGCCGTGAGGTGTCGGCTTAAGTGCCATAACGAGCGCAACCCTTGC

CACTAGTTACTAACAGGTAAAGCTGAGGACTCTGGTGGGACTGCCAGCGTAAGCTGCGAGGAAGGCG  
 GGGATGACGTCAAATCAGCACGGCCCTTACATCCGGGGCGACACACGTGTTACAATGGCGTGGACAA  
 AGGGAAGCCACCTGGCGACAGGGAGCGAATCCCCAAACCACGTCTCAGTTCGGATCGGAGTCTGCAA  
 CCCGACTCCGTGAAGCTGGATTGCTAGTAATCGCGCATCAGCCATGGCGCGGTGAATACGTTCCCGG  
 GCCTTGTACACACCGCCCGTCAAGCCATGGGAGCCGGGGGTACCTGAAGTCCGTAACCGCGAGGATC  
 GGCTAGGGTAAAAGTGGTGACTGGGGCTA

The strain is identified as *Parabacteroides distasonis*.

**Supplementary Table 7. Identification of cultured *F. nucleatum* and *P. distasonis* by Nanopore Sequencing.**

| SPECIES                                  | SEQUENCE NUMBER | PROPORTION | NCBI ID | FAMILY              | GENUS                  |
|------------------------------------------|-----------------|------------|---------|---------------------|------------------------|
| <i>Fusobacterium nucleatum</i>           | 479265          | 97.58      | 851     | <i>Bacteria</i>     | <i>Fusobacterium</i>   |
| <i>Parabacteroides distasonis</i>        | 2391            | 0.49       | 823     | <i>Bacteria</i>     | <i>Parabacteroides</i> |
| <i>Escherichia coli</i>                  | 2224            | 0.45       | 562     | <i>Bacteria</i>     | <i>Escherichia</i>     |
| <i>unclassified</i>                      | 756             | 0.15       | 0       | <i>unclassified</i> | <i>unclassified</i>    |
| <i>Fusobacterium sp. oral taxon 203</i>  | 489             | 0.1        | 671211  | <i>Bacteria</i>     | <i>Fusobacterium</i>   |
| <i>Fusobacterium hwasookii</i>           | 488             | 0.1        | 1583098 | <i>Bacteria</i>     | <i>Fusobacterium</i>   |
| <i>Fusobacterium pseudoperiodonticum</i> | 743             | 0.1        | 2663009 | <i>Bacteria</i>     | <i>Fusobacterium</i>   |
| <i>Parabacteroides sp. CT06</i>          | 111             | 0.02       | 2025876 | <i>Bacteria</i>     | <i>Parabacteroides</i> |
| <i>Luteimonas granuli</i>                | 32              | 0.01       | 1176533 | <i>Bacteria</i>     | <i>Luteimonas</i>      |
| <i>Bacteroides fragilis</i>              | 31              | 0.01       | 817     | <i>Bacteria</i>     | <i>Bacteroides</i>     |
|                                          |                 |            |         |                     |                        |
| SPECIES                                  | SEQUENCE NUMBER | PROPORTION | NCBI ID | FAMILY              | GENUS                  |
| <i>Parabacteroides distasonis</i>        | 99861           | 76.01      | 823     | <i>Bacteria</i>     | <i>Parabacteroides</i> |
| <i>Parabacteroides sp. CT06</i>          | 5210            | 3.97       | 2025876 | <i>Bacteria</i>     | <i>Parabacteroides</i> |
| <i>unclassified</i>                      | 4319            | 3.29       | 0       | <i>unclassified</i> | <i>unclassified</i>    |
| <i>Fusobacterium nucleatum</i>           | 2266            | 1.72       | 851     | <i>Bacteria</i>     | <i>Fusobacterium</i>   |
| <i>Escherichia coli</i>                  | 1301            | 0.99       | 562     | <i>Bacteria</i>     | <i>Escherichia</i>     |
| <i>Bacteroides fragilis</i>              | 1122            | 0.85       | 817     | <i>Bacteria</i>     | <i>Bacteroides</i>     |
| <i>Bacteroides uniformis</i>             | 711             | 0.54       | 820     | <i>Bacteria</i>     | <i>Bacteroides</i>     |
| <i>Paraprevotella xylaniphila</i>        | 495             | 0.38       | 454155  | <i>Bacteria</i>     | <i>Paraprevotella</i>  |
| <i>Bacteroides sp. HF- 5287</i>          | 468             | 0.36       | 2650157 | <i>Bacteria</i>     | <i>Bacteroides</i>     |
| <i>Bacteroides xylanisolvens</i>         | 276             | 0.21       | 371601  | <i>Bacteria</i>     | <i>Bacteroides</i>     |
